# Supplementary material
Source: PubMed Central journal article supplement (PMC3675445)
Supplement: NIHMS291149-supplement-01.pdf [file NIHMS291149-supplement-01.pdf]

# Patient-Physician Gender Concordance and Weight-Related Counseling of Obese Patients

Octavia Pickett-Blakely, MD, MHS, Sara N. Bleich, PhD, Lisa A. Cooper, MD, MPH

## Appendix A

### Association between weight-related counseling and patient-physician gender concordance (including all covariates)

|                                      |                   | Weight-reduction counseling<br>OR (95% CI) | Diet/nutrition counseling<br>OR (95% CI) | Exercise counseling<br>OR (95% CI) |
|--------------------------------------|-------------------|--------------------------------------------|------------------------------------------|------------------------------------|
| Gender concordance                   | Concordant female | 1.29 (0.96, 1.73)                          | 1.13 (0.91, 1.39)                        | 1.22 (0.93, 1.62)                  |
|                                      | Concordant male   | 1.04 (0.69, 1.55)                          | <b>1.58 (1.06, 2.35)</b>                 | <b>1.73 (1.13, 2.67)</b>           |
|                                      | Discordant        | 1.00 (ref)                                 | 1.00 (ref)                               | 1.00 (ref)                         |
| Patient race                         | Black             | 0.80 (0.55, 1.18)                          | 0.88 (0.60, 1.28)                        | <b>0.61 (0.43, 0.87)</b>           |
|                                      | Asian             | 0.96 (0.26, 3.55)                          | 0.84 (0.18, 3.82)                        | 1.01 (0.30, 3.47)                  |
|                                      | Hispanic          | 1.09 (0.72, 1.64)                          | 1.26 (0.89, 1.78)                        | 1.01 (0.71, 1.44)                  |
|                                      | Other             | <b>2.43 (1.14, 5.16)</b>                   | 1.34 (0.63, 2.83)                        | 1.78 (0.64, 4.95)                  |
|                                      | White             | 1.00 (ref)                                 | 1.00 (ref)                               | 1.00 (ref)                         |
| Physician race                       | Black             | 0.77 (0.30, 1.98)                          | 1.42 (0.79, 2.54)                        | 1.57 (0.68, 3.63)                  |
|                                      | Asian             | 0.58 (0.34, 1.00)                          | 1.13 (0.58, 2.19)                        | 1.26 (0.62, 2.53)                  |
|                                      | Hispanic          | 1.22 (0.61, 2.43)                          | 0.71 (0.33, 1.52)                        | 0.57 (0.20, 1.60)                  |
|                                      | Other             | <b>1.53 (0.32, 0.88)</b>                   | 1.45 (0.72, 2.91)                        | 1.25 (0.47, 3.33)                  |
|                                      | Unknown           | 0.78 (0.52, 1.17)                          | 0.87 (0.62, 1.23)                        | 0.92 (0.62, 1.37)                  |
|                                      | White             | 1.00 (ref)                                 | 1.00 (ref)                               | 1.00 (ref)                         |
| Patient age (years)                  | 18-29             | <b>3.92 (2.15, 7.14)</b>                   | 1.83 (0.98, 3.38)                        | <b>1.90 (1.04, 3.46)</b>           |
|                                      | 30-44             | <b>3.18 (1.87, 5.42)</b>                   | <b>1.88 (1.16, 3.04)</b>                 | <b>1.77 (1.11, 2.82)</b>           |
|                                      | 45-64             | <b>1.90 (1.31, 2.76)</b>                   | 1.06 (0.76, 1.48)                        | 1.17 (0.87, 1.57)                  |
|                                      | ≥65               | 1.00 (ref)                                 | 1.00 (ref)                               | 1.00 (ref)                         |
| Physician age (years)                | <55               | 1.15 (0.82, 1.63)                          | 1.35 (0.94, 1.92)                        | 1.41 (0.95, 2.10)                  |
|                                      | ≥55               | 1.00 (ref)                                 | 1.00 (ref)                               | 1.00 (ref)                         |
| Insurance                            | Private           | 1.11 (0.82, 1.51)                          | 1.33 (1.00, 1.78)                        | 1.11 (0.81, 1.52)                  |
|                                      | Nonprivate        | 1.00 (ref)                                 | 1.00 (ref)                               | 1.00 (ref)                         |
| Region                               | Northeast         | <b>2.25 (1.36, 3.70)</b>                   | 1.43 (0.83, 2.48)                        | 1.12 (0.59, 2.12)                  |
|                                      | Midwest           | 1.46 (0.91, 2.34)                          | 1.12 (0.71, 1.75)                        | 0.75 (0.42, 1.31)                  |
|                                      | West              | 0.99 (0.59, 1.67)                          | 0.79 (0.46, 1.35)                        | 0.84 (0.46, 1.53)                  |
|                                      | South             | 1.00 (ref)                                 | 1.00 (ref)                               | 1.00 (ref)                         |
| Comorbidity risk status <sup>a</sup> | Very high         | <b>3.21 (2.08, 4.97)</b>                   | <b>5.54 (3.59, 8.55)</b>                 | <b>3.56 (2.29, 5.53)</b>           |
|                                      | High              | <b>2.56 (1.84, 3.56)</b>                   | <b>3.03 (2.21, 4.17)</b>                 | <b>2.40 (1.72, 3.36)</b>           |
|                                      | Lower             | 1.00 (ref)                                 | 1.00 (ref)                               | 1.00 (ref)                         |
| Visit type                           | Preventive        | <b>1.88 (1.37, 2.59)</b>                   | <b>1.91 (1.45, 2.52)</b>                 | <b>1.93 (1.43, 2.59)</b>           |

|                                    |                                                 | <b>Weight-reduction counseling<br/>OR (95% CI)</b> | <b>Diet/nutrition counseling<br/>OR (95% CI)</b> | <b>Exercise counseling<br/>OR (95% CI)</b> |
|------------------------------------|-------------------------------------------------|----------------------------------------------------|--------------------------------------------------|--------------------------------------------|
|                                    | Chronic, ongoing                                | <b>1.90 (1.46, 2.48)</b>                           | <b>2.29 (1.77, 2.98)</b>                         | <b>2.32 (1.74, 3.09)</b>                   |
|                                    | Acute visit                                     | 1.00 (ref)                                         | 1.00 (ref)                                       | 1.00 (ref)                                 |
|                                    | Seen before, anyone in practice<br>(yes = 1.00) | 0.79 (0.50, 1.27)                                  | 0.96 (0.63, 1.46)                                | 0.80 (0.53, 1.21)                          |
| Time spent with<br>doctor          | >24 minutes                                     | <b>1.79 (1.15, 2.79)</b>                           | <b>1.64 (1.14, 2.35)</b>                         | <b>1.82 (1.20, 2.76)</b>                   |
|                                    | 13-24 minutes                                   | <b>2.39 (1.52, 3.76)</b>                           | <b>2.50 (1.70, 3.68)</b>                         | <b>2.82 (1.79, 4.44)</b>                   |
|                                    | 0-12 minutes                                    | 1.00 (ref)                                         | 1.00 (ref)                                       | 1.00 (ref)                                 |
| Median household<br>income         | Quartile 4 (top)                                | 0.78 (0.44, 1.38)                                  | 0.99 (0.59, 1.67)                                | 0.83 (0.45, 1.52)                          |
|                                    | Quartile 3                                      | 0.85 (0.54, 1.35)                                  | 1.09 (0.74, 1.62)                                | 1.13 (0.73, 1.77)                          |
|                                    | Quartile 2                                      | 0.78 (0.52, 1.27)                                  | 1.05 (0.74, 1.49)                                | 0.97 (0.68, 1.40)                          |
|                                    | Quartile 1 (bottom)                             | 1.00 (ref)                                         | 1.00 (ref)                                       | 1.00 (ref)                                 |
| High school diploma<br>or more (%) | Quartile 4 (top)                                | 1.13 (0.62, 2.06)                                  | 0.91 (0.57, 1.45)                                | 1.48 (0.89, 2.47)                          |
|                                    | Quartile 3                                      | 0.91 (0.56, 1.49)                                  | 0.76 (0.53, 1.10)                                | 1.21 (0.77, 1.90)                          |
|                                    | Quartile 2                                      | 0.84 (0.56, 1.28)                                  | 0.77 (0.55, 1.10)                                | 0.85 (0.57, 1.30)                          |
|                                    | Quartile 1 (bottom)                             | 1.00 (ref)                                         | 1.00 (ref)                                       | 1.00 (ref)                                 |
| <i>n</i>                           |                                                 | 3969                                               | 3969                                             | 3969                                       |

Note: Other race includes: Native Hawaiian/other Pacific Islander, Native American/Alaska Native and more than one race reported. Data were weighted to be representative of the total national population of ambulatory visits in the survey years. Significant point estimates are in bold.

## Appendix B

Study sample characteristics, by patient–physician gender-concordance<sup>a</sup> status, *n* (%) unless otherwise indicated

|                           |                  | Gender-concordance category |                                                |                                             |                             |                           | % missing |
|---------------------------|------------------|-----------------------------|------------------------------------------------|---------------------------------------------|-----------------------------|---------------------------|-----------|
|                           |                  | Gender discordant           |                                                | Gender concordant                           |                             |                           |           |
|                           |                  | All patients                | Female<br>(female patient)<br>( <i>n</i> =487) | Male<br>(male patient)<br>( <i>n</i> =2173) | Female<br>( <i>n</i> =1769) | Male<br>( <i>n</i> =1238) |           |
| Gender                    | Male             | 2256 (43)                   | –                                              | 2173 (100)                                  | 1769 (100)                  | –                         | 0.0       |
|                           | Female           | 3411 (57)                   | 487 (100)                                      | –                                           | –                           | 1238 (100)                |           |
| Age category (years)      | 18–29            | 471 (8)                     | 49 (11)                                        | 164 (7)                                     | 124 (6)                     | 134 (11)                  | 0.0       |
|                           | 30–44            | 1444 (23)                   | 136 (29)                                       | 510 (20)                                    | 444 (12)                    | 354 (26)                  | –         |
|                           | 45–64            | 2584 (45)                   | 239 (45)                                       | 988 (45)                                    | 813 (46)                    | 544 (45)                  | –         |
|                           | ≥65              | 1168 (23)                   | 63 (15)                                        | 511 (27)                                    | 388 (24)                    | 206 (18)                  | –         |
| Race                      | White            | 3677 (72)                   | 273 (67)                                       | 1440 (72)                                   | 1290 (77)                   | 674 (65)                  | 0.0       |
|                           | Black            | 881 (13)                    | 80 (14)                                        | 345 (13)                                    | 196 (8)                     | 260 (19)                  | –         |
|                           | Asian            | 123 (3)                     | 11 (3)                                         | 37 (2.5)                                    | 45 (3)                      | 30 (2)                    | –         |
|                           | Hispanic         | 778 (11)                    | 89 (15)                                        | 290 (11)                                    | 200 (9)                     | 199 (13)                  | –         |
|                           | Other            | 208 (1)                     | 34 (0.04)                                      | 61 (1.5)                                    | 38 (2)                      | 75 (1)                    | –         |
| Comorbidity risk status   | Very high        | 1112 (18)                   | 103 (18)                                       | 402 (17)                                    | 395 (20)                    | 212 (15)                  | 7.7       |
|                           | High             | 2364 (45)                   | 192 (40)                                       | 944 (47)                                    | 745 (44)                    | 483 (42)                  | –         |
|                           | Low              | 1766 (30)                   | 172 (37)                                       | 642 (27)                                    | 509 (28)                    | 443 (34)                  | –         |
| Insurance                 | Private          | 2541 (56)                   | 226 (33)                                       | 890 (49)                                    | 924 (60)                    | 519 (59)                  | 4.1       |
|                           | Non-private      | 2741 (40)                   | 208 (61)                                       | 1154 (47)                                   | 758 (37)                    | 603 (36)                  | –         |
| Region                    | Northeast        | 955 (15)                    | 93 (17)                                        | 361 (15)                                    | 316 (16)                    | 185 (15)                  | 0.0       |
|                           | Midwest          | 1629 (27)                   | 145 (39)                                       | 587 (23)                                    | 481 (23)                    | 416 (37)                  | –         |
|                           | West             | 1937 (40)                   | 122 (28)                                       | 857 (46)                                    | 634 (42)                    | 324 (29)                  | –         |
|                           | South            | 11 (18)                     | 127 (16)                                       | 368 (16)                                    | 338 (19)                    | 313 (20)                  | –         |
| Physician gender          | Male             | 3942 (75)                   | 487 (100)                                      | –                                           | 1769 (100)                  | –                         | 0.0       |
|                           | Female           | 1725 (25)                   | –                                              | 2173 (100)                                  | –                           | 1238 (100)                | –         |
| Physician race            | White            | 2634 (41)                   | 199 (33)                                       | 865 (39)                                    | 750 (44)                    | 550 (41)                  | 13.4      |
|                           | Black            | 306 (3)                     | 44 (8)                                         | 70 (2)                                      | 53 (1)                      | 139 (9)                   | –         |
|                           | Asian            | 692 (13)                    | 73 (14)                                        | 264 (14)                                    | 197 (14)                    | 158 (9)                   | –         |
|                           | Hispanic         | 130 (3)                     | 16 (5)                                         | 49 (3)                                      | 39 (3)                      | 26 (3)                    | –         |
|                           | Other            | 192 (5)                     | 8 (1)                                          | 86 (6)                                      | 65 (5)                      | 33 (3)                    | –         |
| Physician age (years)     | <55              | 2184 (43)                   | 105 (20)                                       | 1011 (51)                                   | 824 (50)                    | 162 (17)                  | 0.2       |
|                           | ≥55              | 3406 (57)                   | 369 (80)                                       | 1140 (40)                                   | 931 (50)                    | 170 (18)                  | –         |
| Weight-related counseling | Weight reduction | 20%                         | 39 (22)                                        | 454 (22)                                    | 349 (20)                    | 256 (20)                  |           |
|                           | Diet/nutrition   | 29.5%                       | 169 (36)                                       | 620 (28)                                    | 514 (28)                    | 414 (34)                  |           |
|                           | Exercise         | 22.5%                       | 129 (25)                                       | 480 (22)                                    | 383 (22)                    | 324 (26)                  |           |

<sup>a</sup>Gender concordance was defined using patient gender as the reference point (e.g., male gender-discordant = male patient, female physician; female gender-discordant = female patient, male physician; female gender-concordant = female patient, female physician; male gender-concordant = male patient, male physician).
